# Supplementary material for: A mesoporous “shell-in-shell” structured nanocatalyst with large surface area, enhanced synergy, and improved catalytic performance for Suzuki–Miyaura coupling reaction
Source: Royal Society of Chemistry journal article supplement (doi:10.1039/c4cc04527k), 2014-01-01
Supplement: c4cc04527k1.pdf [file c4cc04527k1.pdf]

Electronic Supplementary Information

**Mesoporous “Shell-in-Shell” Structured Nanocatalyst with Large Surface Area, Enhanced Synergy, and Improved Catalytic Selectivity for Suzuki-Miyaura Coupling Reaction**

*Baocang Liu,<sup>a,b,c</sup> Yuefang Niu,<sup>a</sup> Yan Li,<sup>a</sup> Fan Yang,<sup>a</sup> Jiamin Guo,<sup>a</sup> Qin Wang,<sup>a,c</sup> Peng Jing,<sup>a</sup> Jun Zhang,<sup>a,b,c\*</sup> and Guohong Yun<sup>c</sup>*

<sup>a</sup>College of Chemistry and Chemical Engineering, Inner Mongolia University, Hohhot 010021, P. R. China.

<sup>b</sup>College of Life Science, Inner Mongolia University, Hohhot 010021, P. R. China

<sup>c</sup>Inner Mongolia Key Lab of Nanoscience and Nanotechnology, Inner Mongolia University, Hohhot 010021, P. R. China

---

\*Corresponding author: J. Zhang, Tel.: +86 471 4992175, Fax: +86 471 4992278, E-mail:

[cejzhang@imu.edu.cn](mailto:cejzhang@imu.edu.cn)

## Experimental Section

### 1. Materials

Tetraethyl orthosilicate (TEOS), tetrabutyl orthotitanate (TBOT), palladium (II) chloride ( $\text{PdCl}_2$ ), cetyltrimethylammonium bromide (CTAB), and  $\text{NaBH}_4$  (AR  $\geq 98\%$ ) were purchased from Sinopharm Chemical Reagent Co., Ltd. Absolute ethanol, ammonia solution (25-28 wt %), and formaldehyde (37% solution) were obtained from Tianjin Windship Chemistry Technological Co., Ltd. Hydroxy propyl cellulose (HPC, MW = 80,000) and poly(vinyl alcohol) (PVA, Mw = 10,000) were obtained from Sigma-Aldrich. 3-Aminopropyl-triethoxysilane (APTES, 99%), 4-nitrophenol (AR), resorcinol (AR), and all reagents used in Suzuki–Miyaura coupling reaction were purchased from Aladdin. All chemicals were used as received without further treatment. Deionized water was used for all experiments.

### 2. Synthesis of nanocatalysts

#### 2.1. Synthesis of @meso-TiO<sub>2</sub>-NH<sub>2</sub> spheres

Monodisperse SiO<sub>2</sub> spheres were synthesized via a Stöber sol-gel method according to the previous report,<sup>1</sup> and were used as scarified templates for synthesis of @TiO<sub>2</sub> spheres. The synthesis of @TiO<sub>2</sub> spheres follows a previously reported method with a slight modification.<sup>2</sup> Typically, an aqueous solution containing SiO<sub>2</sub> spheres (5 mL) was dispersed in the mixture of hydroxypropyl cellulose (HPC, 0.4 g), distilled water (0.4 mL), and absolute ethanol (100 mL) under vigorous magnetic stirring for 30 min. TBOT (4 mL) previously dissolved in absolute ethanol (20 mL) was introduced dropwise at a rate of 0.5 mL/min. Afterward, the solution was refluxed at 85 °C for 100 min to obtain SiO<sub>2</sub>@TiO<sub>2</sub> spheres. The SiO<sub>2</sub>@TiO<sub>2</sub> spheres were separated and washed with ethanol for five times. Then, the SiO<sub>2</sub>@TiO<sub>2</sub> spheres

were dispersed in NaOH aqueous solution (0.25 M, 40 mL) to remove SiO<sub>2</sub> cores to achieve the hollow meso-TiO<sub>2</sub> (@meso-TiO<sub>2</sub>). The @meso-TiO<sub>2</sub> spheres were isolated by centrifugation and washed with deionized water and ethanol for several times. Finally, the @meso-TiO<sub>2</sub> spheres were re-dispersed in ethanol (10 mL) for further use. The @meso-TiO<sub>2</sub> sphere solution was dispersed into absolute ethanol (30 mL) and APTES (0.2 mL) was added and stirred at room temperature for 12 h to ensure the amino groups to be decorated on the surface of @meso-TiO<sub>2</sub> spheres. The white precipitates were collected by centrifugation and washed with ethanol, and then were re-dispersed in deionized water (10 mL).

### **2.2. Synthesis of @meso-TiO<sub>2</sub>-NH<sub>2</sub>/Pd<sup>2+</sup> spheres**

To the above @meso-TiO<sub>2</sub>-NH<sub>2</sub> solution, 5 mL of PdCl<sub>2</sub> solution (1 g/L) was added and the mixture solution was diluted to 100 mL with deionized water. After stirring for 12 h, the products were collected by centrifugation and washed with deionized water for five times, and then were re-dispersed in ethanol (10 mL).

### **2.3. Synthesis of @meso-TiO<sub>2</sub>/Pd spheres**

The @meso-TiO<sub>2</sub>/Pd spheres were prepared via a colloidal deposition method with some modification.<sup>3</sup> In a typical procedure, PdCl<sub>2</sub> solution (1 g/L, 5 mL) and PVA solution (1 wt%, 0.36 mL) were diluted to 100 mL with deionized water under vigorous stirring. After 30 min, NaBH<sub>4</sub> solution (0.1 mol/L, 1.4 mL) was injected into the above solution, and a dark-brown solution was obtained, which indicated that the Pd colloids were formed. After another 30 min, 10 mL of @meso-TiO<sub>2</sub>-NH<sub>2</sub> was added immediately. After stirring for 4 h, the Pd colloids were completely absorbed, as indicated by the discoloration of the solution. The @meso-TiO<sub>2</sub>/Pd spheres were collected by centrifugation, and washed with deionized water

for five times to completely remove the chloride ion.

#### **2.4. Synthesis of @Pd/meso-TiO<sub>2</sub>/Pd@meso-SiO<sub>2</sub>, @meso-TiO<sub>2</sub>/Pd@meso-SiO<sub>2</sub>, and @meso-TiO<sub>2</sub>/Pd@SiO<sub>2</sub> spheres**

To synthesize the @Pd/meso-TiO<sub>2</sub>/Pd@meso-SiO<sub>2</sub>, @meso-TiO<sub>2</sub>/Pd@meso-SiO<sub>2</sub>, and @meso-TiO<sub>2</sub>/Pd@SiO<sub>2</sub> spheres, the @Pd<sup>2+</sup>/meso-TiO<sub>2</sub>/Pd<sup>2+</sup>@RF and @meso-TiO<sub>2</sub>/Pd@RF spheres were firstly synthesized via a polymerization described as follows.<sup>4</sup> Typically, the above the @meso-TiO<sub>2</sub>/Pd solution was added into a beaker charged with deionized water (50 mL), ammonia solution (0.18 mL), and CTAB (0.027g) under stirring for 30 min. Afterward, resorcinol (0.23 g) and formaldehyde solution (0.35 mL) were added, and the reaction was carried out at room temperature for 16 h under continuous magnetic stirring. The @meso-TiO<sub>2</sub>/Pd<sup>2+</sup>@RF and @ Pd<sup>2+</sup>/meso-TiO<sub>2</sub>/Pd@RF spheres were obtained by centrifugation and washed with deionized water and absolute ethanol for three times, respectively.

The @Pd/meso-TiO<sub>2</sub>/Pd@meso-SiO<sub>2</sub>, @meso-TiO<sub>2</sub>/Pd@meso-SiO<sub>2</sub>, and @meso-TiO<sub>2</sub>/Pd@SiO<sub>2</sub> spheres were synthesized as follows: typically, the aqueous solution of @Pd<sup>2+</sup>/meso-TiO<sub>2</sub>/Pd<sup>2+</sup>@RF and @meso-TiO<sub>2</sub>/Pd@RF spheres (10 mL) were dispersed in a mixture of deionized water (60 mL), ethanol (100 mL), ammonia aqueous(1 mL), and CTAB (0.3 g) under vigorously magnetic stirring for 0.5 h. Then, TEOS (0.3 mL) was introduced and the reaction was maintained for 12 h at room temperature to obtain the @Pd<sup>2+</sup>/meso-TiO<sub>2</sub>/Pd<sup>2+</sup>@RF@SiO<sub>2</sub> and @meso-TiO<sub>2</sub>/Pd@RF@SiO<sub>2</sub>, respectively. The @Pd<sup>2+</sup>/meso-TiO<sub>2</sub>/Pd<sup>2+</sup>@RF@SiO<sub>2</sub> and @meso-TiO<sub>2</sub>/Pd@RF@SiO<sub>2</sub> spheres were isolated by centrifugation, and washed with de-ionized water and ethanol, and dried in oven at 80 °C for 12 h. The @PdO/meso-TiO<sub>2</sub>/PdO@meso-SiO<sub>2</sub> and @meso-TiO<sub>2</sub>/PdO@meso-SiO<sub>2</sub> spheres

were obtained under calcination at 550 °C for 3 h. Then, the @PdO/meso-TiO<sub>2</sub>/PdO@meso-SiO<sub>2</sub> and @meso-TiO<sub>2</sub>/PdO@meso-SiO<sub>2</sub> spheres were reduced in a hydrogen atmosphere at 300 °C (14 % hydrogen and 86 % argon) for 2 h to obtain the final @Pd/meso-TiO<sub>2</sub>/Pd@meso-SiO<sub>2</sub> and @meso-TiO<sub>2</sub>/Pd@meso-SiO<sub>2</sub> spheres.

To synthesize the @Pd/meso-TiO<sub>2</sub>/Pd@SiO<sub>2</sub> spheres, the above obtained @Pd<sup>2+</sup>/meso-TiO<sub>2</sub>/Pd<sup>2+</sup>@RF solution was added into a beaker charged with absolute ethanol (66 mL), deionized water (4.2 mL), and ammonia solution (3.4 mL) under stirring for 30 min. Afterward, TEOS (0.4 mL) was added, and the reaction was carried out at room temperature for 24 h under continuous magnetic stirring. The @Pd<sup>2+</sup>/meso-TiO<sub>2</sub>/Pd<sup>2+</sup>@RF@SiO<sub>2</sub> spheres were isolated by centrifugation, and washed with de-ionized water and ethanol, and then dried in an oven at 80 °C for 12 h. The @PdO/meso-TiO<sub>2</sub>/PdO@SiO<sub>2</sub> spheres were obtained under calcination at 550 °C for 3 h. Then, the @PdO/meso-TiO<sub>2</sub>/PdO@SiO<sub>2</sub> were reduced in a hydrogen atmosphere (14 % hydrogen and 86 % argon) at 300 °C for 2 h to obtain the final @Pd/meso-TiO<sub>2</sub>/Pd@SiO<sub>2</sub> spheres.

### **2.5. Synthesis of @Pd/meso-TiO<sub>2</sub>/Pd and @meso-TiO<sub>2</sub>/Pd spheres**

For comparison, the @Pd/meso-TiO<sub>2</sub>/Pd and @meso-TiO<sub>2</sub>/Pd spheres were synthesized via the calcination of @meso-TiO<sub>2</sub>-NH<sub>2</sub>/Pd<sup>2+</sup> and @meso-TiO<sub>2</sub>-NH<sub>2</sub>/Pd spheres at 600 °C for 3 h following the reduction under H<sub>2</sub> atmosphere (14 % hydrogen and 86 % argon) at 300 °C for 2 h.

### **3. Characterization**

Powder X-ray diffraction (XRD) and Small Angle Powder X-ray diffraction (SAXRD) were performed using a PANalytical Empyrean diffractometer. Scanning transmission electron

microscopy (STEM) and transmission electron microscopy (TEM) characterization was performed on a FEI tacnai F20 field-emission transmission electron microscope (FE-TEM). Scanning electron micrographs were recorded with a HITACHI S4800 field-emission scanning electron microscope (FE-SEM). The absorption spectra were recorded using a SPECORD.50 UV-vis spectrophotometer (Analytikjena). Fourier transform infrared spectroscopy (FT-IR) was performed on MAGNA-IR750 spectrometer by using KBr pellets. Surface area measurements were performed on an ASAP 2010 Brunauer-Emmett-Teller (BET) analyzer. Actual Pd content in the nanocatalysts was estimated with a VARIAN VISTA-MPX ICP-Mass spectroscopy (MS, USA).

#### **4. Catalytic tests**

The Suzuki–Miyaura coupling reaction of aryl iodides and phenylboronic acid was carried out in a sealed heavy wall pressure vessel (35 mL). All reactions and manipulations were run under air atmosphere. Typically, a reaction tube was charged with aryl iodide (0.5 mmol), aryl boronic acid (1 mmol), catalyst (20 mg),  $K_2CO_3$  (1 mmol), and absolute ethanol (10 mL). The mixture was stirred at 80 °C, and monitored by HPLC at specific time. The crude product was characterized by HPLC analysis (HITACHI, D 2000 with a 25 cm Lachrom C18 column and UV-visible detector with measurement wavelength at 254 nm)

The catalytic performance for reduction of 4-nitrophenol to 4-aminophenol with  $NaBH_4$  aqueous solution at room temperature was carried out as follows: Typically, the catalyst (2 mg) was added into millipore water (40 mL) to form a homogeneous suspension by ultrasonication. Then,  $NaBH_4$  aqueous solution (0.5 M, 0.5 mL) was added into the above suspension, and the suspension was stirred at room temperature for 10 min. Then, 4-

nitrophenol (0.012 M, 0.25 mL) was infused into the above suspension. After stirring several seconds, the mixture was rapidly transferred to the quartz cell to monitor the reaction progress by measuring the UV-vis absorption spectra of the mixture to evaluate the catalytic activity and stability of the catalysts, as the reactant of 4-nitrophenol has a strong absorption peak at 400 nm, while the product of 4-aminophenol has a median absorption peak at 295 nm.

#### **5. Catalytic performance of “shell-in-shell” @Pd/meso-TiO<sub>2</sub>/Pd@meso-SiO<sub>2</sub> catalyst for 4-nitrophenol reduction reaction**

The catalytic performance of @Pd/meso-TiO<sub>2</sub>/Pd@meso-SiO<sub>2</sub> and @meso-TiO<sub>2</sub>/Pd@meso-SiO<sub>2</sub> nanocatalysts were also evaluated using model reaction of the reduction of 4-nitrophenol (4-NP) to 4-aminophenol (4-AP) with NaBH<sub>4</sub> aqueous solution at room temperature. The evolution of UV-vis spectra with reaction time for the reduction of 4-NP to 4-AP on different catalysts is monitored (Fig. S13a and b). It shows that the @Pd/meso-TiO<sub>2</sub>/Pd@meso-SiO<sub>2</sub> catalyst possesses superior catalytic activity to @meso-TiO<sub>2</sub>/Pd@meso-SiO<sub>2</sub> nanocatalyst, and the complete conversion of 4-NP to 4-AP can be realized within 10 min. The reduction rates shown in Fig. S13c indicate that @Pd/meso-TiO<sub>2</sub>/Pd@meso-SiO<sub>2</sub> and @meso-TiO<sub>2</sub>/Pd@meso-SiO<sub>2</sub> nanocatalysts exhibit excellent catalytic performance and that 4-NP can be completely reduced to 4-AP within 14 min. The linear fit with a coefficient of determination very close to unity also supports the assumption of pseudo-first-order kinetics (Fig. S13d) according to a linear relation of  $\ln(C_t/C_0)$  versus reaction time.<sup>5</sup> The @Pd/meso-TiO<sub>2</sub>/Pd@meso-SiO<sub>2</sub> catalyst shows the fastest reaction rate in comparison with others, and the apparent kinetic rate constant is estimated to be 0.34 min<sup>-1</sup>. The catalytic reusability test shows that the catalytic activity almost maintain constant even after ten cycles running (Fig.

S13e and f), suggesting the outstanding catalytic stability of the nanocatalyst. The catalytic performance tests implies that the “shell-in-shell” @meso-TiO<sub>2</sub>/Pd@meso-SiO<sub>2</sub> nanocatalyst can be used as a nanoreactor for efficient catalysis of various reactions, and its high catalytic activity may largely rely on the novel design of “shell-in-shell” structural configuration with merits for improving the catalytic performance.

### Route I

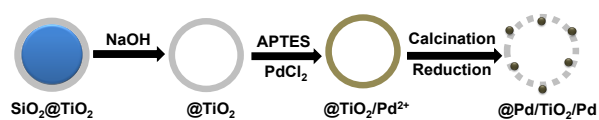



## Route II

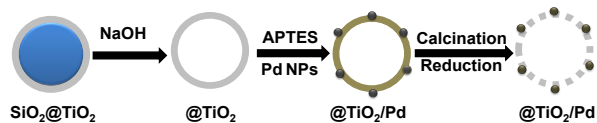

## Route III

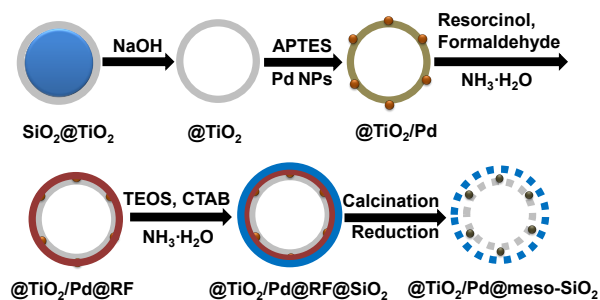

## Route IV

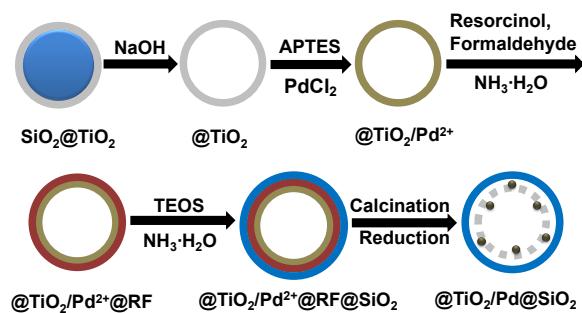

**Scheme S1.** Schematic illustration for synthesis of different nanocatalysts. Route I: single-shell  $@\text{Pd}/\text{meso-TiO}_2/\text{Pd}$  spheres, Route II: single-shell  $@\text{meso-TiO}_2/\text{Pd}$  spheres, Route III: “shell-in-shell”  $@\text{meso-TiO}_2/\text{Pd}@meso\text{-SiO}_2$  spheres, and IV: “shell-in-shell”  $@\text{meso-TiO}_2/\text{Pd}@SiO_2$  spheres.

**Table S1** Suzuki–Miyaura coupling reactions of aryl halides and phenylboronic acid over different catalysts<sup>a</sup>

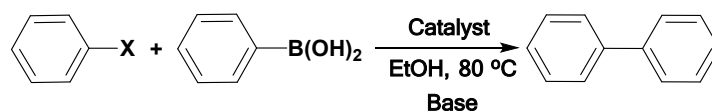

<sup>a</sup> Reaction conditions: 80 °C, ethanol (10 mL), iodobenzene (0.5 mmol), phenylboronic acid (1 mmol), K<sub>2</sub>CO<sub>3</sub> or Cs<sub>2</sub>CO<sub>3</sub> (1 mmol), catalyst (10 mg or 25 mg), reaction time (0.5h).

<sup>b</sup> Determined by HPLC using pentamethylbenzene as internal standard.

| Nanocatalysts                                        | X  | Base                            | Cat./mg | Pd/wt.% | Time/min | Con./% <sup>b</sup> | TOF/h <sup>-1c</sup> |
|------------------------------------------------------|----|---------------------------------|---------|---------|----------|---------------------|----------------------|
| @Pd/meso-TiO <sub>2</sub> /Pd@meso-SiO <sub>2</sub>  | I  | K <sub>2</sub> CO <sub>3</sub>  | 10      | 0.21    | 30       | 99                  | 5130                 |
| @meso-TiO <sub>2</sub> /Pd@meso-SiO <sub>2</sub>     | I  | K <sub>2</sub> CO <sub>3</sub>  | 20      | 0.20    | 20       | 98                  | 3961                 |
| @Pd/meso-TiO <sub>2</sub> /Pd                        | I  | K <sub>2</sub> CO <sub>3</sub>  | 10      | 0.30    | 30       | 99                  | 3476                 |
| @meso-TiO <sub>2</sub> /Pd                           | I  | K <sub>2</sub> CO <sub>3</sub>  | 20      | 0.48    | 20       | 99                  | 1632                 |
| @Pd/meso-TiO <sub>2</sub> /Pd@SiO <sub>2</sub>       | I  | K <sub>2</sub> CO <sub>3</sub>  | 10      | 0.17    | 30       | 2                   | 124                  |
| @Pd/meso-TiO <sub>2</sub> /Pd @meso-SiO <sub>2</sub> | Br | Cs <sub>2</sub> CO <sub>3</sub> | 25      | 0.21    | 60       | 99                  | 1026                 |
| @meso-TiO <sub>2</sub> /Pd@meso-SiO <sub>2</sub>     | Br | Cs <sub>2</sub> CO <sub>3</sub> | 25      | 0.20    | 60       | 90                  | 960                  |
| @Pd/meso-TiO <sub>2</sub> /Pd                        | Br | Cs <sub>2</sub> CO <sub>3</sub> | 30      | 0.30    | 60       | 88                  | 515                  |
| @meso-TiO <sub>2</sub> /Pd                           | Br | Cs <sub>2</sub> CO <sub>3</sub> | 30      | 0.48    | 60       | 83                  | 304                  |
| @Pd/meso-TiO <sub>2</sub> /Pd@SiO <sub>2</sub>       | Br | Cs <sub>2</sub> CO <sub>3</sub> | 25      | 0.17    | 60       | 3                   | 37                   |

<sup>c</sup> TOF is calculated by moles of product per molar Pd per hour.

**Table S2** The catalytic performance of mesoporous “shell-in-shell” @Pd/meso-TiO<sub>2</sub>/Pd@meso-SiO<sub>2</sub> nanocatalyst for Suzuki–Miyaura coupling reaction at different temperatures.<sup>a</sup>

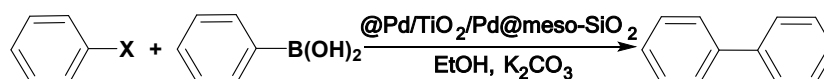

| Temperature /°C | X  | Cat./mg | Time/min | Con./% <sup>b</sup> |
|-----------------|----|---------|----------|---------------------|
| 50              | I  | 10      | 30       | 67                  |
| 60              | I  | 10      | 30       | 87                  |
| 70              | I  | 10      | 30       | 98                  |
| 80              | I  | 10      | 30       | 99                  |
| 40              | Br | 25      | 240      | 33                  |
| 50              | Br | 25      | 240      | 54                  |
| 60              | Br | 25      | 240      | 72                  |
| 70              | Br | 25      | 240      | 97                  |
| 80              | Br | 25      | 240      | 99                  |

<sup>a</sup> Reaction conditions: 80 °C, ethanol (10 mL), iodobenzene (0.5 mmol), phenylboronic acid (1 mmol), K<sub>2</sub>CO<sub>3</sub> or Cs<sub>2</sub>CO<sub>3</sub> (1 mmol), catalyst (10 mg or 25 mg), reaction time (0.5h).

<sup>b</sup> Determined by HPLC using pentamethylbenzene as internal standard.

**Table S3** The catalytic performance of mesoporous “shell-in-shell” @Pd/meso-TiO<sub>2</sub>/Pd@meso-SiO<sub>2</sub> nanocatalyst for Suzuki–Miyaura coupling reaction under the condition of different alkali.<sup>a</sup>

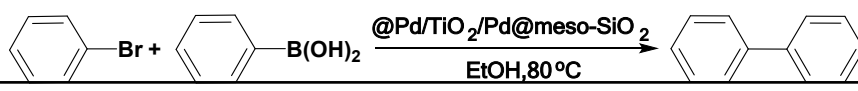

| Base                            | Cat./mg | T/min | Con./% <sup>b</sup> |
|---------------------------------|---------|-------|---------------------|
| Cs <sub>2</sub> CO <sub>3</sub> | 25      | 60    | 99                  |
| K <sub>2</sub> CO <sub>3</sub>  | 25      | 240   | 99                  |
| CH <sub>3</sub> ONa             | 25      | 240   | 99                  |
| Na <sub>2</sub> CO <sub>3</sub> | 25      | 240   | 98                  |
| NaHCO <sub>3</sub>              | 25      | 240   | 96                  |
| KOH                             | 25      | 240   | 8                   |
| NaOH                            | 25      | 240   | 6                   |
| LiOH                            | 25      | 240   | 4                   |
| triethylamine                   | 25      | 240   | 10                  |

<sup>a</sup> Reaction conditions: ethanol (10 mL), iodobenzene (0.5 mmol), phenylboronic acid (1 mmol).

<sup>b</sup> Determined by HPLC using pentamethylbenzene as internal standard.

**Table S4** The catalytic performance of mesoporous “shell-in-shell” hollow @Pd/TiO<sub>2</sub>/Pd@meso-SiO<sub>2</sub> nanocatalyst for Suzuki–Miyaura coupling reactions in different solvent.<sup>a</sup>

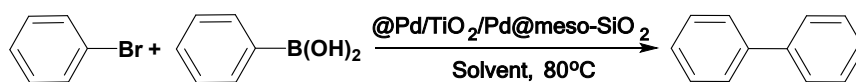

| Solvent            | Cat./mg | Time/min | Con./% <sup>b</sup> |
|--------------------|---------|----------|---------------------|
| EtOH               | 25      | 240      | 99                  |
| DMF                | 25      | 240      | 11                  |
| Toluene            | 25      | 240      | 9                   |
| DMSO               | 25      | 240      | 8                   |
| CH <sub>3</sub> CN | 25      | 240      | 12                  |
| cyclohexane        | 25      | 240      | 6                   |
| dioxane            | 25      | 240      | 13                  |

<sup>a</sup> Reaction conditions: ethanol (10 mL), iodobenzene (0.5 mmol), phenylboronic acid (1 mmol).

<sup>b</sup> Determined by HPLC using pentamethylbenzene as internal standard.

**Table S5** The leaching content of Pd for “shell-in-shell” @Pd/meso-TiO<sub>2</sub>/Pd@meso-SiO<sub>2</sub> and Pd/SiO<sub>2</sub> (SOL-IMP) catalysts before and after one cycle catalytic testing as determined by ICP-MS measurement.

| <b>Pd content</b>                                                          | <b>Before testing</b> | <b>After one cycle testing</b> |
|----------------------------------------------------------------------------|-----------------------|--------------------------------|
| Pd content in @Pd/meso-SiO <sub>2</sub> /Pd@meso-SiO <sub>2</sub> catalyst | 0.21 wt %             | 0.20 wt %                      |
| Pd content in mother liquor                                                | 0 µg·mL <sup>-1</sup> | 0.06 µg·mL <sup>-1</sup>       |
| Pd content in Pd/SiO <sub>2</sub> (SOL-IMP) catalyst                       | 0.98 wt %             | 0.92 wt %                      |
| Pd content in mother liquor                                                | 0 µg·mL <sup>-1</sup> | 0.31 µg·mL <sup>-1</sup>       |

<sup>a</sup> Reaction conditions: 80 °C, ethanol (10 mL), bromobenzene (0.5 mmol), phenylboronic acid (1 mmol), Cs<sub>2</sub>CO<sub>3</sub> (1 mmol), reaction time: 60 min.

<sup>b</sup> Determined by HPLC using pentamethylbenzene as internal standard.

**Table S6.** Suzuki–Miyaura coupling reaction of bromobenzene and phenylboronic acid in the mother liquor after one cycle catalytic testing and over its corresponding @Pd/meso-SiO<sub>2</sub>/Pd@meso-SiO<sub>2</sub> catalyst<sup>a</sup>.

| Nanocatalysts                                                  | Base                            | Cat./mg | Time/min | Con./% <sup>b</sup> |
|----------------------------------------------------------------|---------------------------------|---------|----------|---------------------|
| Mother liquor after one cycle catalytic testing                | Cs <sub>2</sub> CO <sub>3</sub> | -       | 60       | <1                  |
| @Pd/meso-SiO <sub>2</sub> /Pd@meso-SiO <sub>2</sub> (Recycled) | Cs <sub>2</sub> CO <sub>3</sub> | 23      | 60       | 98                  |

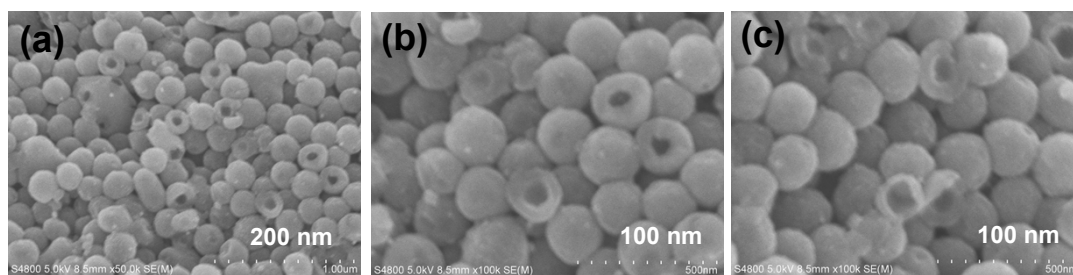

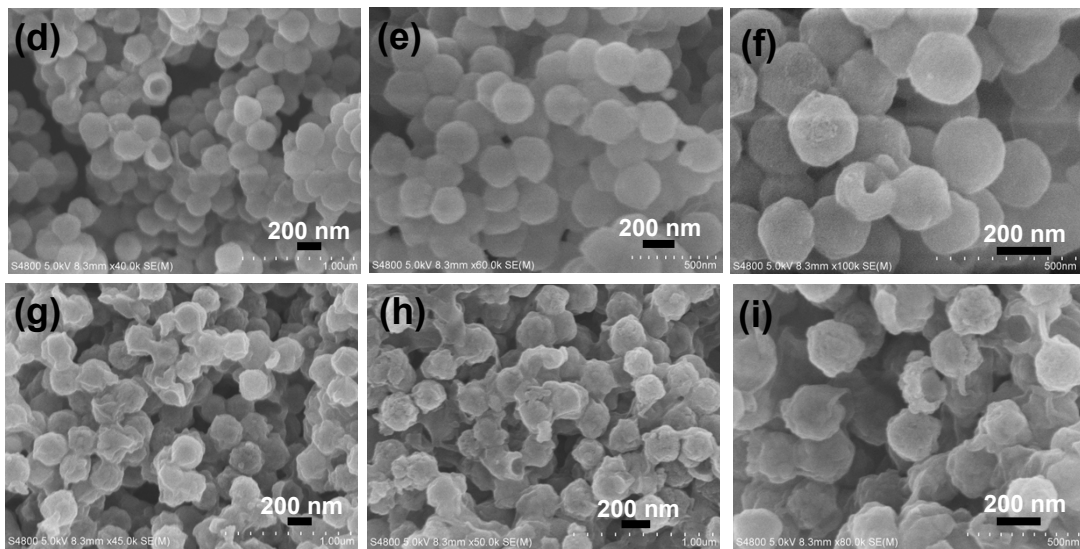

**Fig. S1** SEM images of (a-c) single-shell @Pd<sup>2+</sup>/meso-TiO<sub>2</sub>/Pd<sup>2+</sup> spheres, (d-f) “shell-in-shell” @Pd<sup>2+</sup>/meso-TiO<sub>2</sub>/Pd<sup>2+</sup>@RF spheres, and (g-i) triple-shell @Pd<sup>2+</sup>/meso-TiO<sub>2</sub>/Pd<sup>2+</sup>@RF@meso-SiO<sub>2</sub> spheres.

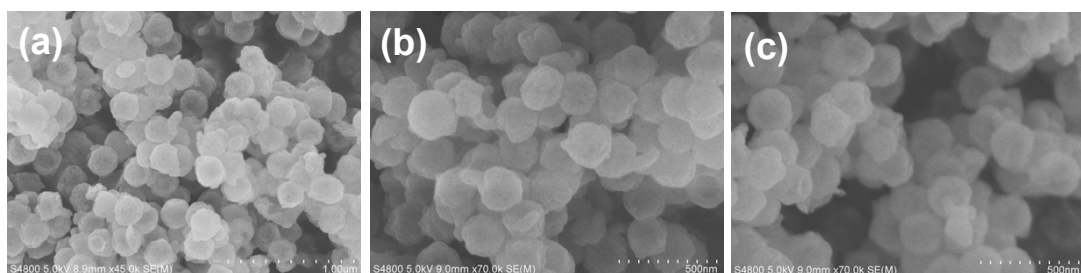



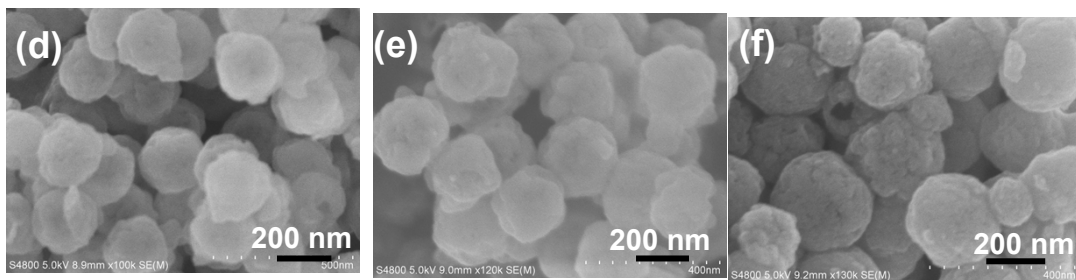

**Fig. S2** (a-f) SEM images of mesoporous "shell-in-shell"  $@Pd/meso-TiO_2/Pd@meso-SiO_2$  nanocatalyst.

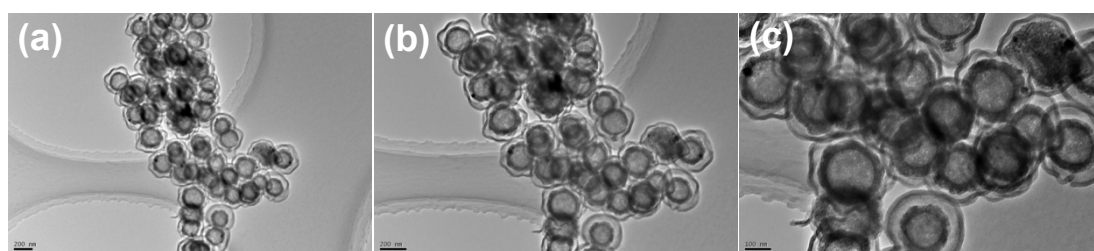

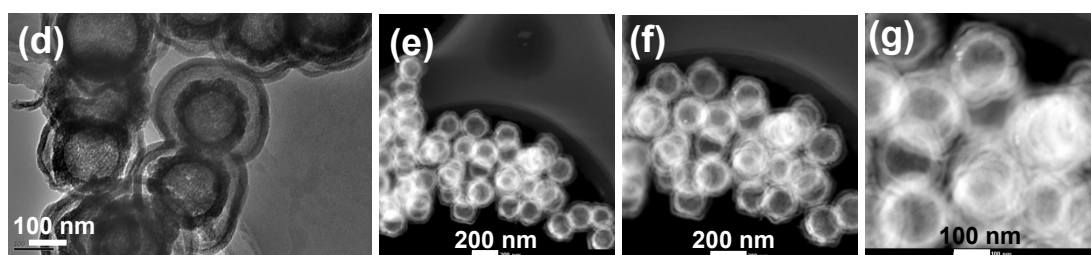

**Fig. S3** TEM (a-d) and STEM images (e-g) of mesoporous "shell-in-shell" structured  $@Pd/meso-TiO_2/Pd@meso-SiO_2$  nanocatalyst.

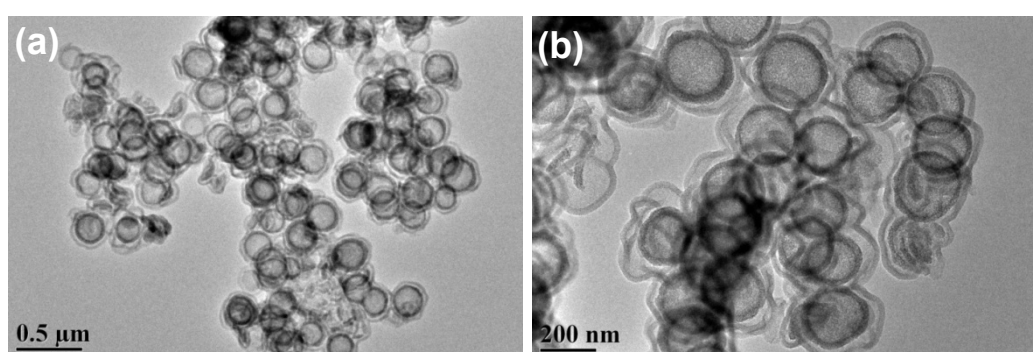

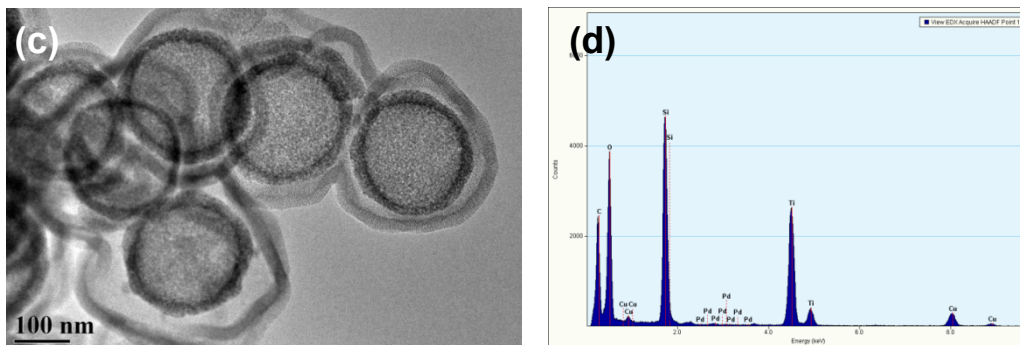

**Fig. S4** TEM images (a-c) and EDX spectrum (d) of mesoporous “shell-in-shell” structured @Pd/meso-TiO<sub>2</sub>/Pd@meso-SiO<sub>2</sub> nanocatalyst.

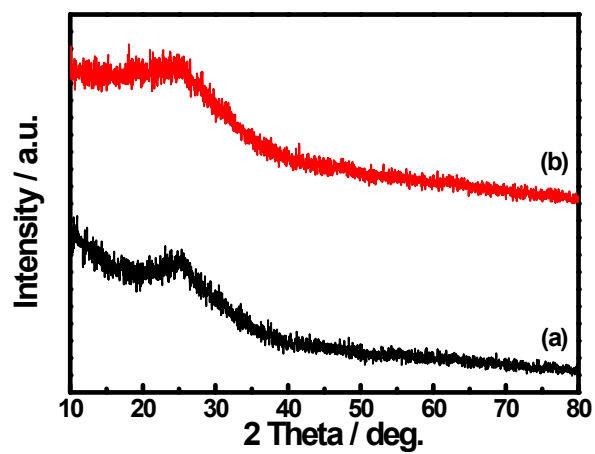

**Fig. S5** XRD patterns of (a) @Pd/meso-TiO<sub>2</sub>/Pd@meso-SiO<sub>2</sub> and (b) @ meso-TiO<sub>2</sub>/Pd<sup>2+</sup>@RF@SiO<sub>2</sub> nanocatalysts.

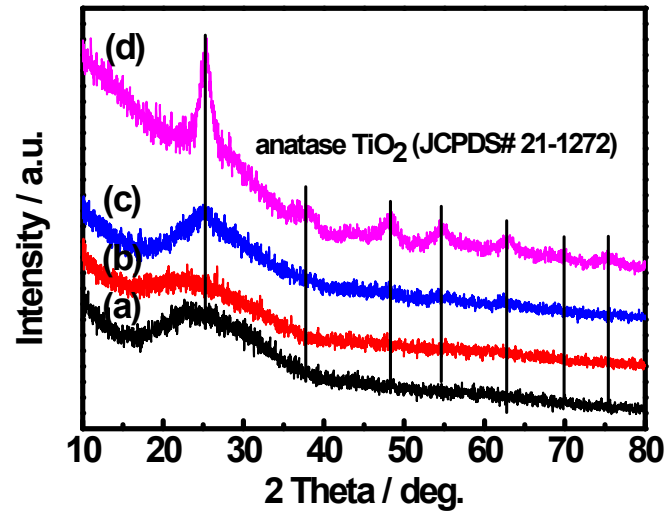

**Fig. S6** XRD patterns of @Pd/meso-TiO<sub>2</sub>/Pd@meso-SiO<sub>2</sub> sphere calcinated at (a) 450 °C, (b) 550 °C, (c) 650°C, and (d) 750 °C.

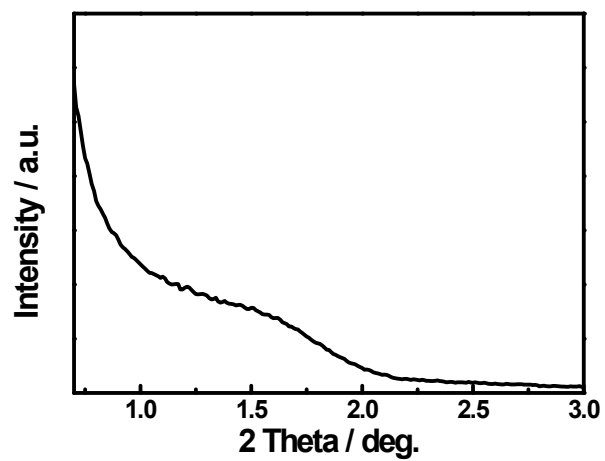

**Fig. S7** SAXRD of mesoporous “shell-in-shell” @Pd/meso-TiO<sub>2</sub>/Pd@meso-SiO<sub>2</sub> nanocatalyst.

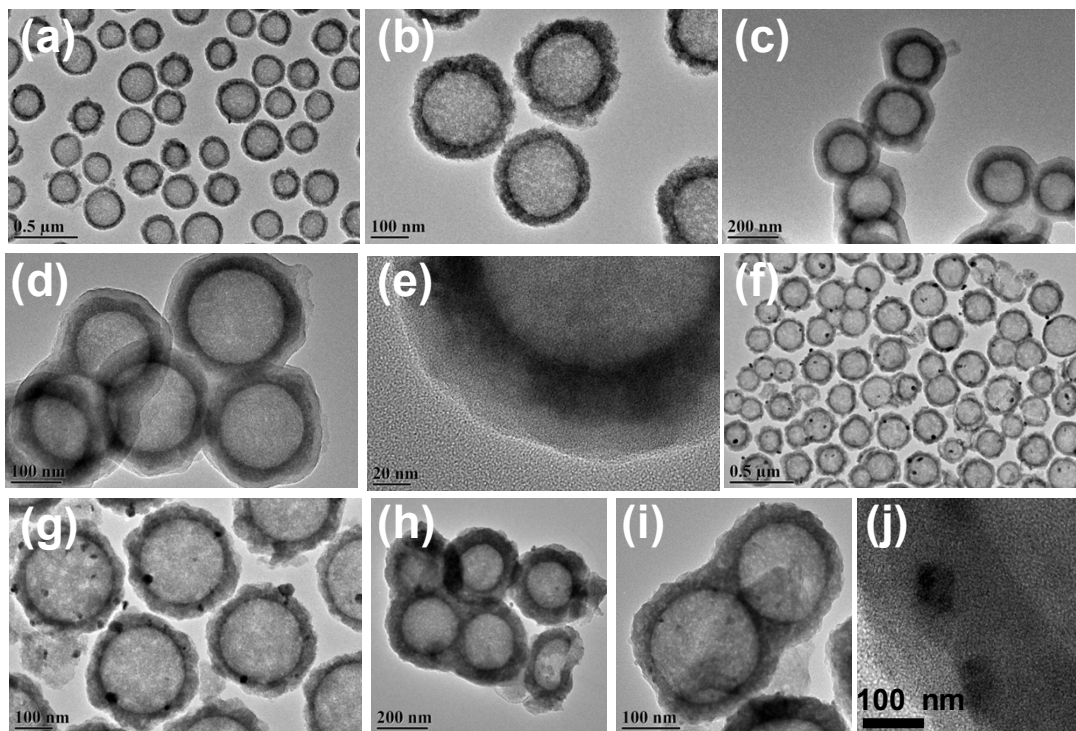

**Fig. S8** TEM images of (a and b) @meso-TiO<sub>2</sub>/Pd<sup>2+</sup> spheres, (c-e) @ meso-TiO<sub>2</sub>/Pd<sup>2+</sup>@RF spheres, (f and g) @Pd/meso-TiO<sub>2</sub>/Pd spheres, and (h-j) @meso-TiO<sub>2</sub>/Pd spheres.

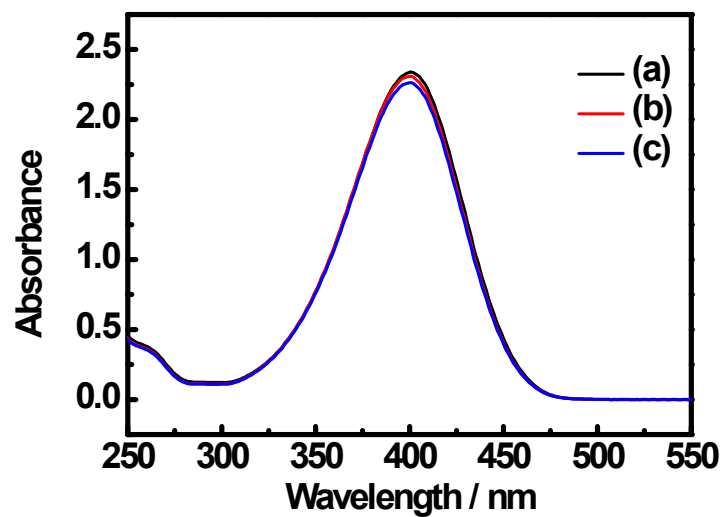

**Fig. S9** The absorbance change of the 4-nitrophenol solution after 30 min absorption: (a) the original 4-nitrophenol solution, (b) the solution with traditional Pd/SiO<sub>2</sub> catalyst, and (c) the solution with “shell-in-shell” @Pd/meso-SiO<sub>2</sub>/Pd@meso-TiO<sub>2</sub> catalyst.



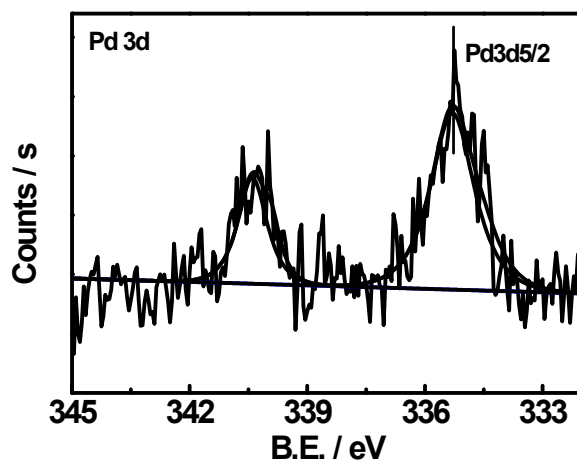

**Fig. S10** Experimental and fitted XPS spectra of Pd3d of mesoporous “shell-in-shell” hollow @Pd/meso-TiO<sub>2</sub>/Pd@meso-SiO<sub>2</sub> nanocatalyst.

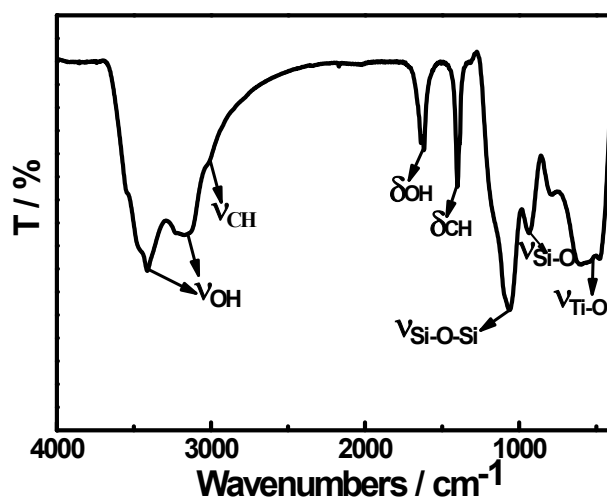

**Fig. S11** FT-IR spectrum of mesoporous "shell-in-shell" @Pd/meso-TiO<sub>2</sub>/Pd@meso-SiO<sub>2</sub> nanocatalyst.

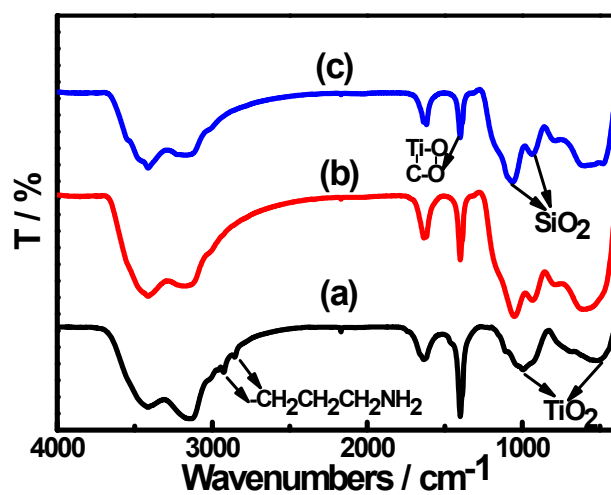

**Fig. S12** FT-IR spectra of (a) @meso-TiO<sub>2</sub>-NH<sub>2</sub>/Pd<sup>2+</sup>, (b) @meso-TiO<sub>2</sub>/Pd@meso-SiO<sub>2</sub>, and (c) @Pd/meso-TiO<sub>2</sub>/Pd@meso-SiO<sub>2</sub> nancatalysts.

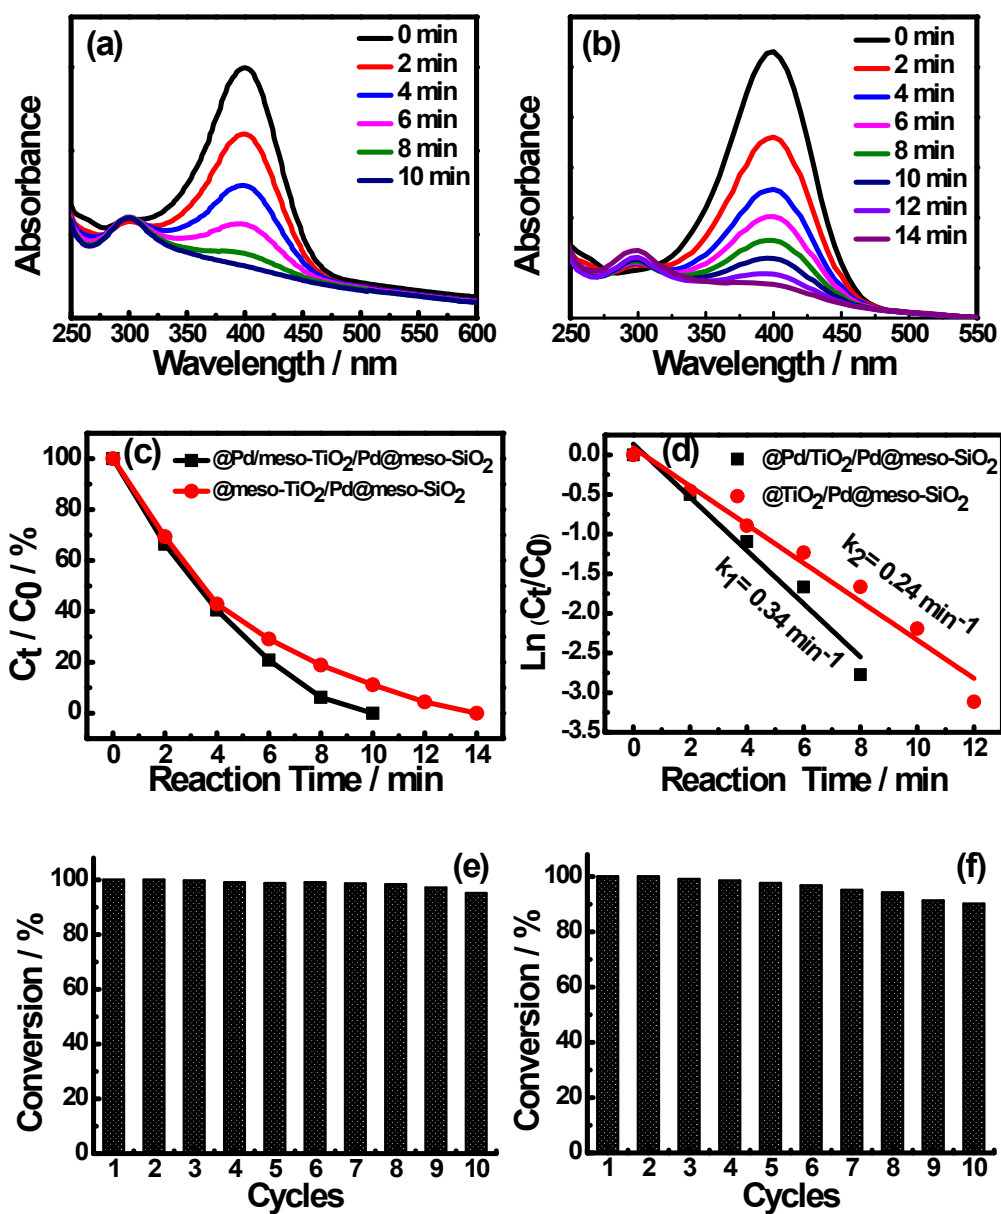

**Fig. S13** (a and b) UV-vis spectra showing the reduction of 4-NP to 4-AP on  $@Pd/meso-TiO_2/Pd@meso-SiO_2$  and  $@meso-TiO_2/Pd@meso-SiO_2$  nanocatalysts, (c) Catalytic tests of the reduction rate for the reduction of 4-NP on  $@Pd/meso-TiO_2/Pd@meso-SiO_2$  and  $@meso-TiO_2/Pd@meso-SiO_2$  nanocatalysts; (d) Plot of  $\ln(C_t/C_0)$  against the reaction time of  $@Pd/meso-TiO_2/Pd@meso-SiO_2$  and  $@meso-TiO_2/Pd@meso-SiO_2$  nanocatalysts; and (e and f) Catalytic stability tests of  $@Pd/meso-TiO_2/Pd@meso-SiO_2$  and  $@meso-TiO_2/Pd@meso-SiO_2$  nanocatalysts.

## References

1. N. C. Strandwitz, S. Shaner, and G. D. Stucky, *J. Mater. Chem.*, 2011, **21**, 10672-10675.
2. J. B. Joo, Q. Zhang, M. Dahl, I. Lee, J. Goebel, F. Zaera and Y. D. Yin, *Energ. Environ. Sci.*, 2012, **5**, 6321-6327.
3. L. Kesavan, R. Tiruvalam, M. H. Ab Rahim, M. I. bin Saiman, D. I. Enache, R. L. Jenkins, N. Dimitratos, J. A. Lopez-Sanchez, S. H. Taylor, D. W. Knight, C. J. Kiely and G. J. Hutchings, *Science*, 2011, **331**, 195-199.
4. N. Li, Q. Zhang, J. Liu, J. Joo, A. Lee, Y. Gan and Y. Yin, *Chem. Commun.*, 2013, **49**, 5135-5137.
5. M. Pérez-Lorenzo, B. Vaz, V. Salgueiriño and M. A. Correa-Duarte, *Chem -A. Eur. J.*, 2013, **19**, 12196-12211.
